# Supplementary material for: Sea urchin-like Bi2S3/curcumin heterojunction rapidly kills bacteria and promotes wound healing under near-infrared light
Source: Royal Society of Chemistry journal article supplement (doi:10.1039/d2bm01474b), 2022-01-01
Supplement: d2bm01474b1.pdf [file d2bm01474b1.pdf]

## Electronic Supplementary Information

### Sea Urchin-like Bi<sub>2</sub>S<sub>3</sub>/Curcumin Heterojunction Rapidly Kills Bacteria and Promotes Wound Healing under Near-Infrared Light

Danya Wan<sup>a</sup>, Xiangmei Liu<sup>a,b\*</sup>, Wenchan Sun<sup>a</sup>, Yuqian Qiao<sup>c</sup>, Da-fu Chen<sup>d,\*</sup>, Yufeng Zheng<sup>c</sup>, Shuilin Wu<sup>c</sup>

<sup>a</sup> Ministry-of-Education Key Laboratory for the Green Preparation and Application of Functional Materials, Hubei Key Laboratory of Polymer Materials, School of Materials Science & Engineering, Hubei University, Wuhan 430062, China. E-mail: [liuxiangmei1978@163.com](mailto:liuxiangmei1978@163.com) (X. M.Liu)

<sup>b</sup> School of Health Science and Biomedical Engineering, Hebei University of Technology, Tianjin 300401, China

<sup>c</sup> School of Materials Science & Engineering, Peking University, Yiheyuan Road 5#, Beijing 100871, China. E-mail: [slwu@pku.edu.cn](mailto:slwu@pku.edu.cn) (S.L. Wu)

<sup>d</sup> Beijing JiShuiTan Hospital, Beijing Research Institute Orthopaedics & Traumatology, Lab Bone Tissue Engineering, Beijing 100035, Peoples R China. E-mail: [chendfjst@126.com](mailto:chendfjst@126.com) (D-F. Chen)

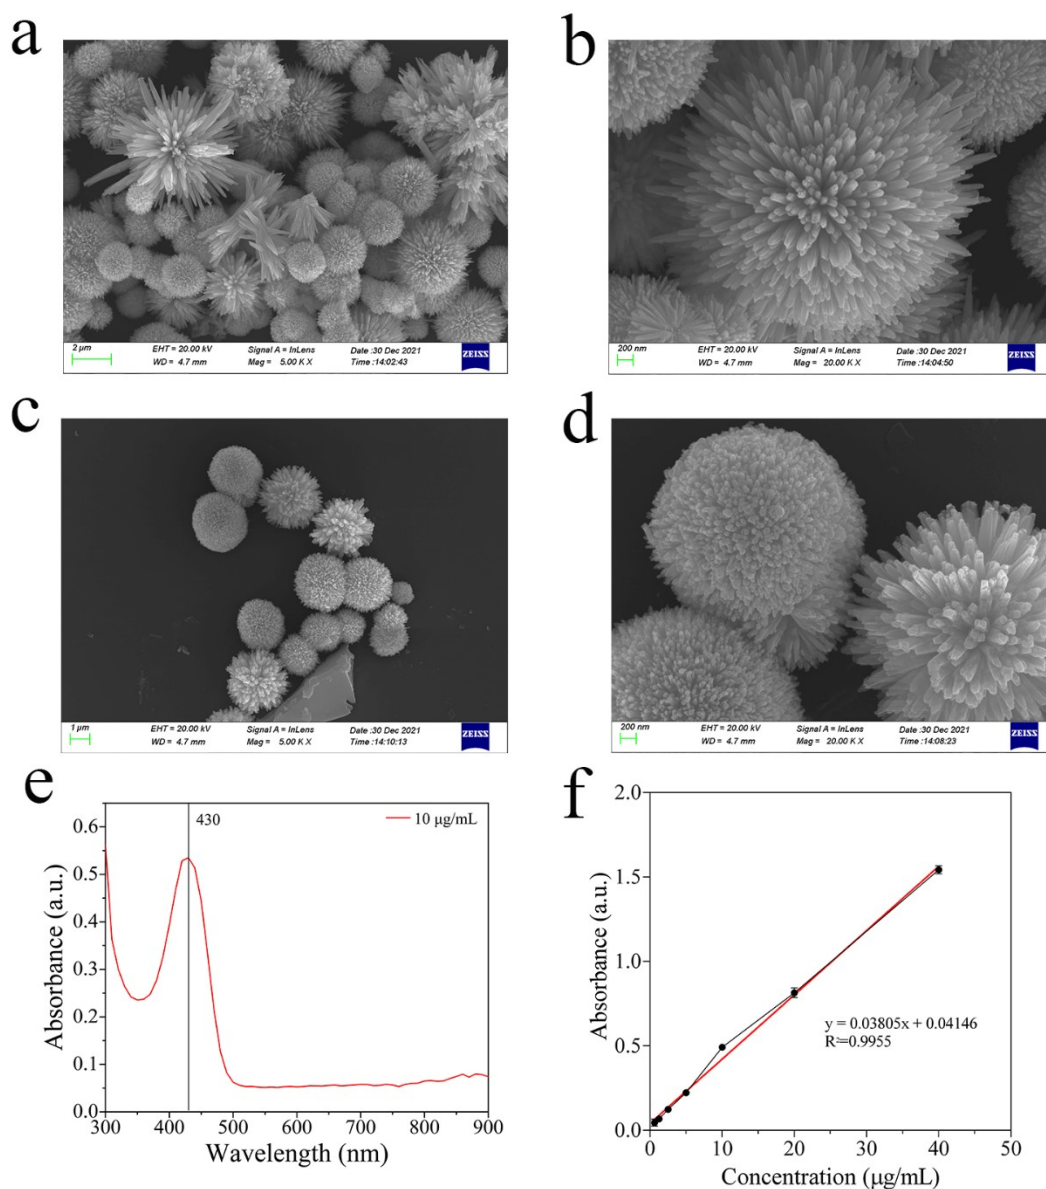

**Fig. S1** Morphology of synthetic sample. (a,b) Sea urchin-like  $\text{Bi}_2\text{S}_3/\text{Cur}$  (a) and high magnification SEM images (b). (c,d) Sea urchin-like  $\text{Bi}_2\text{S}_3$  morphology (c) and high magnification SEM image (d). (e) Absorption (300-900 nm) of 10  $\mu\text{g}/\text{mL}$  Cur dissolved in ethanol. (f) The standard curve of Cur in ethanol solution.

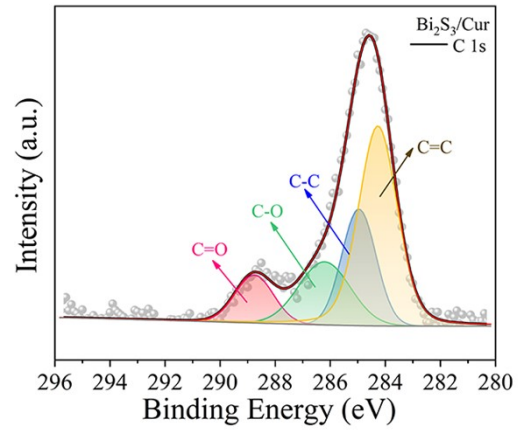

**Fig. S2** XPS spectrum of C1s of Bi<sub>2</sub>S<sub>3</sub>/Cur.

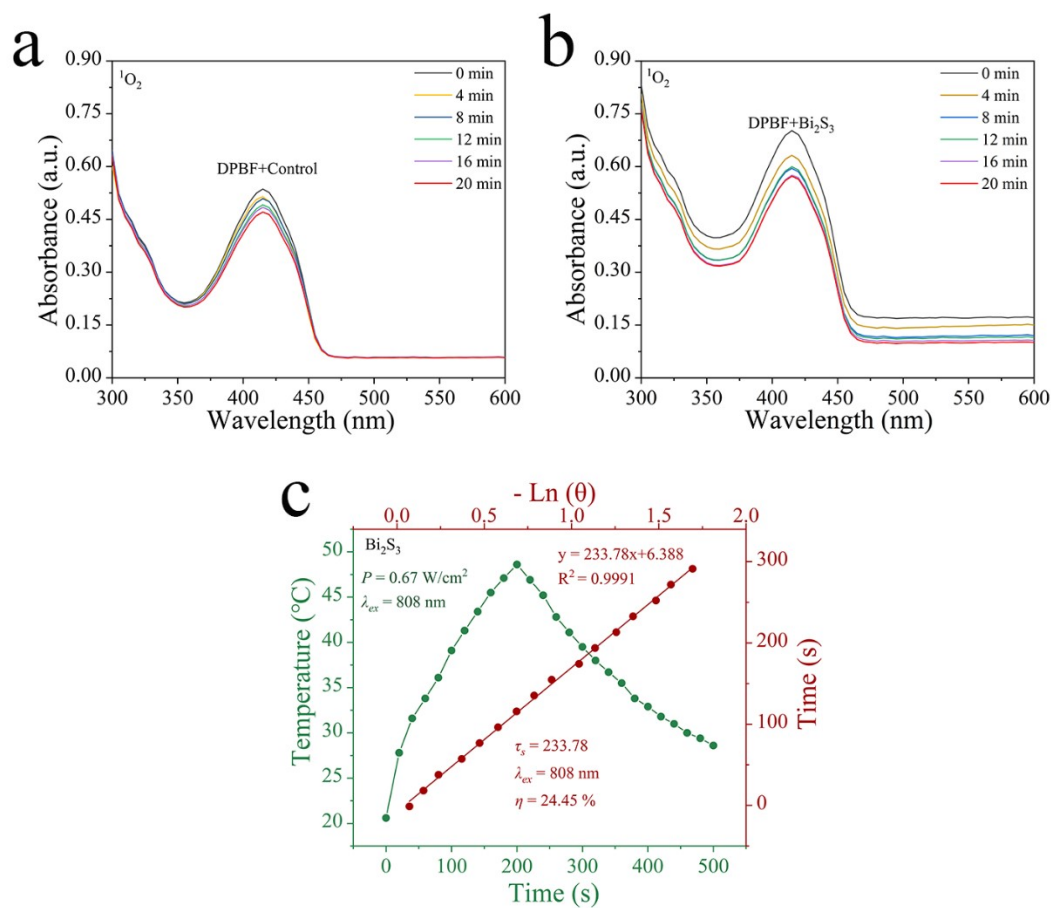

**Fig. S3** The  $^1\text{O}_2$  produced by the control (a) and  $\text{Bi}_2\text{S}_3$  (b) was detected by DPBF under 808 nm light irradiation. (c) Calculate the photothermal conversion efficiency ( $\eta$ ) of  $\text{Bi}_2\text{S}_3$  at 808 nm. Green line: heating and cooling curves of  $\text{Bi}_2\text{S}_3$  in a specific period of time. Brown line: The time constant  $\tau_s$  of the cooling cycle is calculated using linear time data.

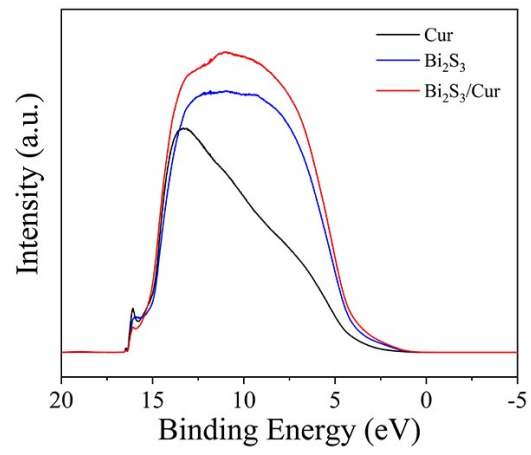

**Fig. S4** UPS spectra of Cur, Bi<sub>2</sub>S<sub>3</sub> and Bi<sub>2</sub>S<sub>3</sub>/Cur.

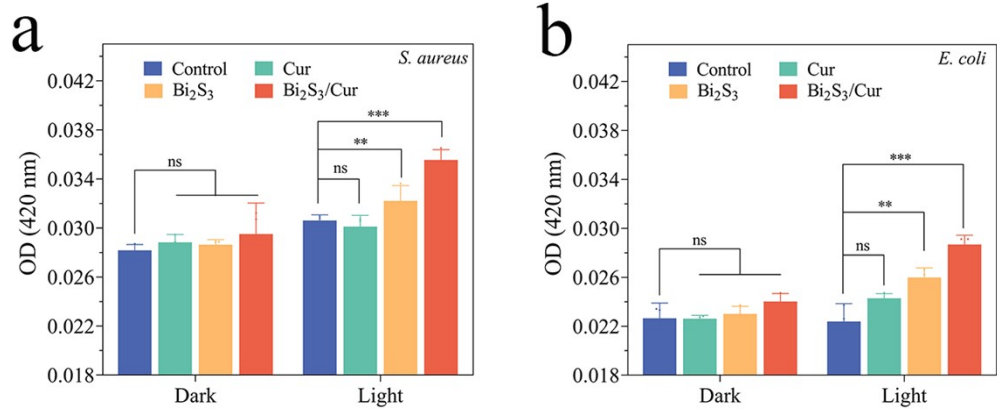

**Fig. S5** Detection of membrane permeability of *S. aureus* (a) and *E. coli* (b) by ONPG.

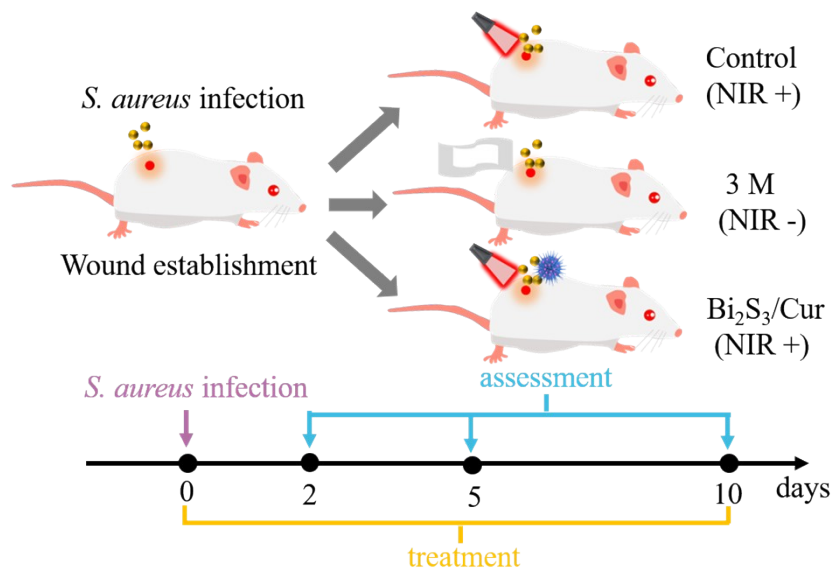

**Fig. S6** Diagram of the experimental design for testing the antibacterial effect of  $\text{Bi}_2\text{S}_3/\text{Cur}$  *in vivo*.
